# Supplementary material
Source: MDPI journal article supplement (https://www.mdpi.com/2071-1050/15/24/16699)
Supplement: s1 [file s1 › sustainability-2690113-supplementary.pdf]

Table S1: Calculation methods for evaluation indicators.

| Subsystems | Codes | Indicators                                                               | Units                  | Calculation Methods                                                                                                                       |
|------------|-------|--------------------------------------------------------------------------|------------------------|-------------------------------------------------------------------------------------------------------------------------------------------|
| Driver     | D1    | Natural population growth rate                                           | ‰                      | Natural population growth of the year/ average population of the year                                                                     |
|            | D2    | Urbanization rate                                                        | %                      | Urban population of the year / total population of the year                                                                               |
|            | D3    | GDP growth rate                                                          | %                      | GDP of the current year / GDP of the last year                                                                                            |
|            | D4    | GDP per capita                                                           | CNY/person             | GDP of the year / total population of the year                                                                                            |
|            | D5    | Share of tertiary industry                                               | %                      | Tertiary industry output value of the year / GDP of the year                                                                              |
|            | D6    | Value of agricultural output per capita                                  | CNY/person             | Agricultural output value of the year / total population of the year                                                                      |
|            | D7    | Livestock and poultry population per capita                              | heads/person           | Livestock and poultry population in pig equivalent of the year <sup>1</sup> / total population of the year                                |
|            | D8    | Value of industrial output per capita                                    | CNY/person             | Industrial output value of the year / total population of the year                                                                        |
| Pressure   | P1    | Population density                                                       | people/km <sup>2</sup> | Total population of the year / total land area of the year                                                                                |
|            | P2    | Annual disposable income per capita                                      | CNY/person             | Total disposable income of the year / total population of the year                                                                        |
|            | P3    | GDP density                                                              | CNY/m <sup>2</sup>     | GDP of the year / total land area of the year                                                                                             |
|            | P4    | Chemical fertilizer usage per unit area of arable land                   | t/km <sup>2</sup>      | Total chemical fertilizer usage of the year / arable land area of the year                                                                |
|            | P5    | Pesticide usage per unit area of arable land                             | t/km <sup>2</sup>      | Total pesticide usage of the year / arable land area of the year                                                                          |
|            | P6    | Plastic film usage per unit area of arable land                          | t/km <sup>2</sup>      | Total plastic film usage of the year / arable land area of the year                                                                       |
|            | P7    | Emissions of livestock and poultry manure per unit area of arable land   | kg/km <sup>2</sup>     | Total nitrogen emissions from livestock and poultry manure in pig equivalent of the year <sup>2</sup> / total land area of the year       |
|            | P8    | COD emissions in industrial wastewater per unit area of land             | t/km <sup>2</sup>      | Total COD emissions in industrial wastewater of the year / total land area of the year                                                    |
|            | P9    | Industrial solid waste emissions per unit area of land                   | t/km <sup>2</sup>      | Total industrial solid waste emissions of the year / total land area of the year                                                          |
| State      | S1    | Arable land area per capita                                              | m <sup>2</sup> /person | Arable land area of the year / total population of the year                                                                               |
|            | S2    | Garden land area per capita                                              | m <sup>2</sup> /person | Garden land area of the year / total population of the year                                                                               |
|            | S3    | Forest land area per capita                                              | m <sup>2</sup> /person | Forest land area of the year / total population of the year                                                                               |
|            | S4    | Grassland area per capita                                                | m <sup>2</sup> /person | Grassland area of the year / total population of the year                                                                                 |
|            | S5    | Wetland area per capita                                                  | m <sup>2</sup> /person | Wetland area of the year / total population of the year                                                                                   |
|            | S6    | Construction land area per capita                                        | m <sup>2</sup> /person | Construction land area of the year / total population of the year                                                                         |
|            | S7    | Transportation land area per capita                                      | m <sup>2</sup> /person | Transportation land area of the year / total population of the year                                                                       |
|            | S8    | Water body area per capita                                               | m <sup>2</sup> /person | Water body area of the year / total population of the year                                                                                |
|            | S9    | Grain production yield per unit area of arable land                      | kg/m <sup>2</sup>      | Total grain production yield of the year / arable land area of the year                                                                   |
| Impact     | I1    | Frequency of occurrence of geological hazards                            | times                  | Frequency of occurrence of geological hazards in the year                                                                                 |
|            | I2    | Direct economic losses caused by geological hazards                      | million CNY            | Direct economic losses caused by geological hazards in the year                                                                           |
|            | I3    | Urban registered unemployment rate                                       | %                      | Urban unemployed population of the year / urban employed and unemployed population of the year                                            |
|            | I4    | Engel coefficient                                                        | %                      | Household food expenditure of the year / household disposable income of the year                                                          |
|            | I5    | Grain production yield per capita                                        | kg/person              | Total grain production yield of the year / total population of the year                                                                   |
|            | I6    | Arable land area growth rate                                             | %                      | Arable land area of the current year / arable land area of the last year                                                                  |
|            | I7    | Rate of crops affected by natural disasters                              | %                      | Crop affected area of the year / crop sown area of the year                                                                               |
|            | I8    | Rate of crops damaged by natural disasters                               | %                      | Crop damaged area of the year / crop affected area of the year                                                                            |
| Response   | R1    | Proportion of afforested area                                            | %                      | Total afforested area of the year / total land area of the year                                                                           |
|            | R2    | Control rate of forest diseases, pests and rodents                       | %                      | Forest land area free of diseases, pests, and rodents of the year / forest land area affected by diseases, pests, and rodents of the year |
|            | R3    | Rate of street and road cleaning in built-up areas                       | %                      | Road cleaning area of the year / built-up area of the year                                                                                |
|            | R4    | Harmless treatment disposal rate of domestic waste                       | %                      | Amount of domestic waste treated harmlessly in the year / amount of domestic waste collected in the year                                  |
|            | R5    | Completed industrial pollution control investments per unit area of land | CNY/km <sup>2</sup>    | Completed industrial pollution control investments of the year / total land area of the year                                              |
|            | R6    | Environmental protection expenditure per unit area of land               | CNY/km <sup>2</sup>    | Environmental protection expenses of the year / total land area of the year                                                               |
|            | R7    | Degree of agricultural mechanization per unit area of arable land        | kW/km <sup>2</sup>     | Total power of agricultural machinery of the year / arable land area of the year                                                          |
|            | R8    | Proportion of effective irrigated area                                   | %                      | Effective irrigated area of the year / crop sown area of the year                                                                         |

<sup>1</sup> According to the Technical Guidelines for Measuring the Land Carrying Capacity of Livestock and Poultry Manure released by Ministry of Agriculture and Rural Affairs of the People's Republic of China ([http://www.moa.gov.cn/gk/tzgg\\_1/tfw/201801/t20180122\\_6135486.htm](http://www.moa.gov.cn/gk/tzgg_1/tfw/201801/t20180122_6135486.htm)), pig equivalent is a standardized measurement for calculating the amount of livestock and poultry within a specific region. One pig, excreting 11kg of nitrogen and 1.65kg of phosphorus is considered as one pig equivalent. Converting according to the amount of nitrogen and phosphorus in livestock and poultry manure, one hundred pigs are equivalent to 15 dairy cows, 30 beef cattle, 250 sheep, or 2500 poultry. The detailed formula was described as follows:

$$Q = q_{pig} + \frac{20}{3} q_{dairy\ cow} + \frac{10}{3} q_{beef\ cattle} + \frac{2}{5} q_{sheep} + \frac{1}{25} q_{poultry} \quad (S1)$$

where  $Q$  is livestock and poultry population in terms of pig equivalent,  $q_{pig}$  is total pig population,  $q_{dairy\ cow}$  is total dairy cow population,  $q_{beef\ cattle}$  is total beef cattle population,  $q_{sheep}$  is total sheep population, and  $q_{poultry}$  is total poultry population.

<sup>2</sup> Total nitrogen emissions of livestock and poultry manure are also calculated using pig equivalent. According to the Technical Guidelines for Measuring the Land Carrying Capacity of Livestock and Poultry Manure released by Ministry of Agriculture and Rural Affairs of the People's Republic of China ([http://www.moa.gov.cn/gk/tzgg\\_1/tfw/201801/t20180122\\_6135486.htm](http://www.moa.gov.cn/gk/tzgg_1/tfw/201801/t20180122_6135486.htm)), the nitrogen supply per unit pig equivalent is 7.0 kg, taking into account the loss of livestock and poultry manure during collection, treatment and storage. The detailed formula was described as follows:

$$M = 7.0 \times Q \quad (S2)$$

where  $M$  is total nitrogen emissions of livestock and poultry manure in terms of pig equivalent, 7.0 is the annual nitrogen excretion coefficient of one pig equivalent, and  $Q$  is livestock and poultry population in terms of pig equivalent.
